# Supplementary material
Source: PubMed Central journal article supplement (PMC4837654)

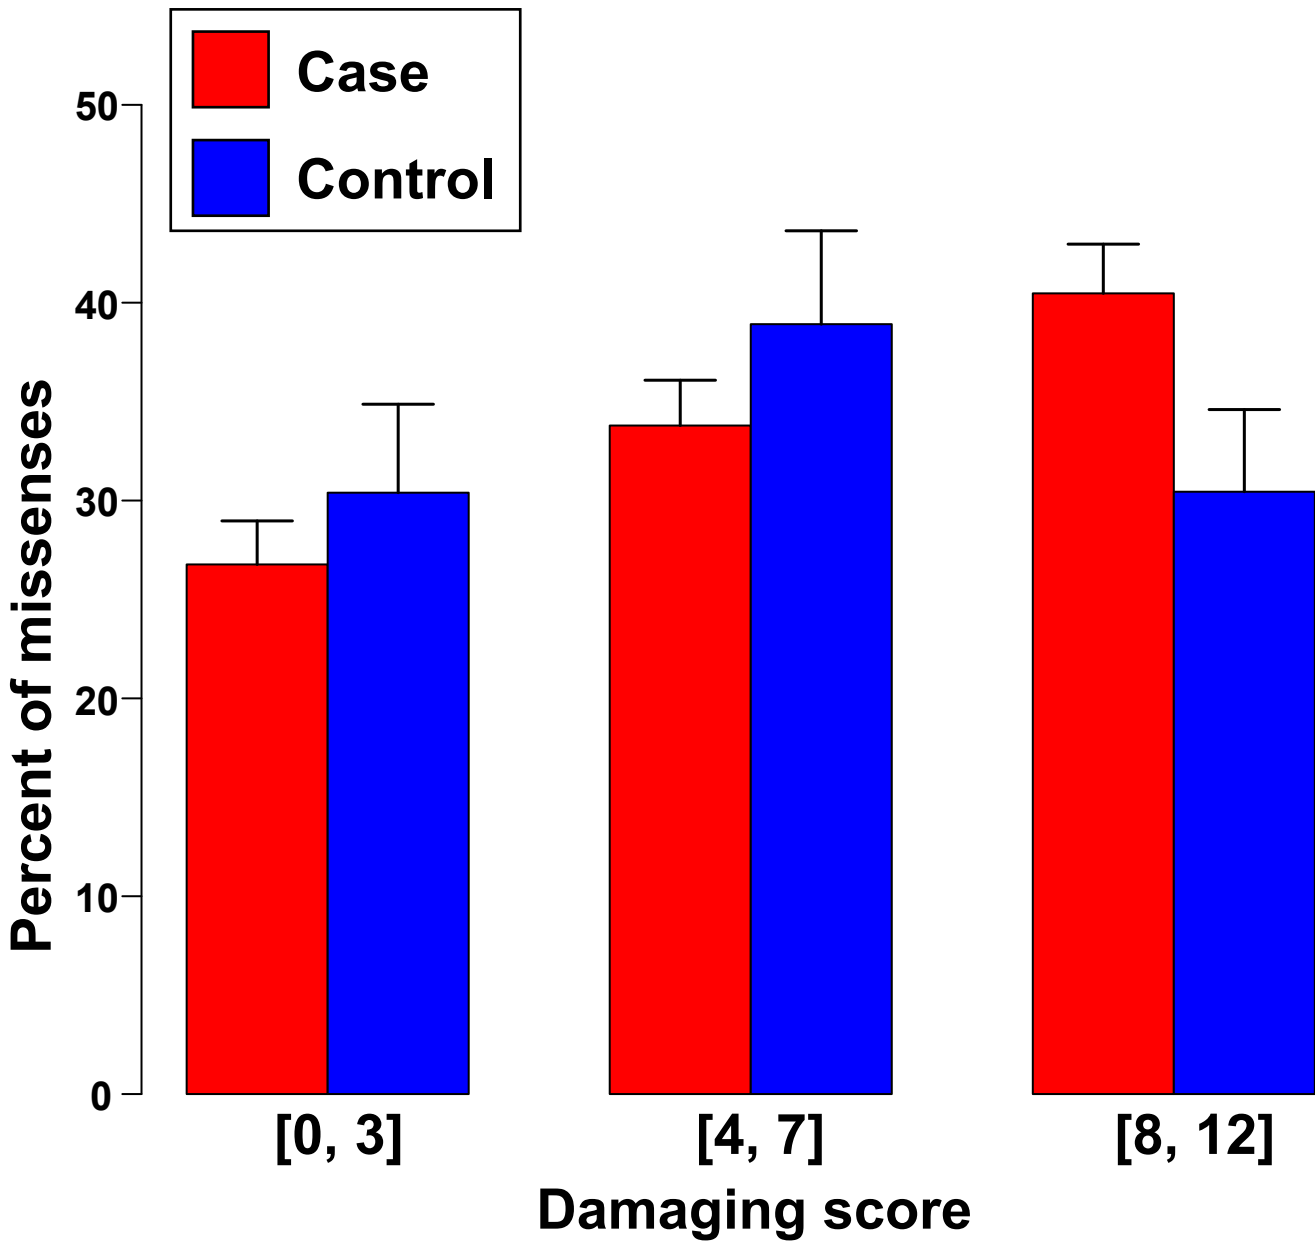

Supplement: NIHMS775440-supplement-supFig1.pdf [file NIHMS775440-supplement-supFig1.pdf]

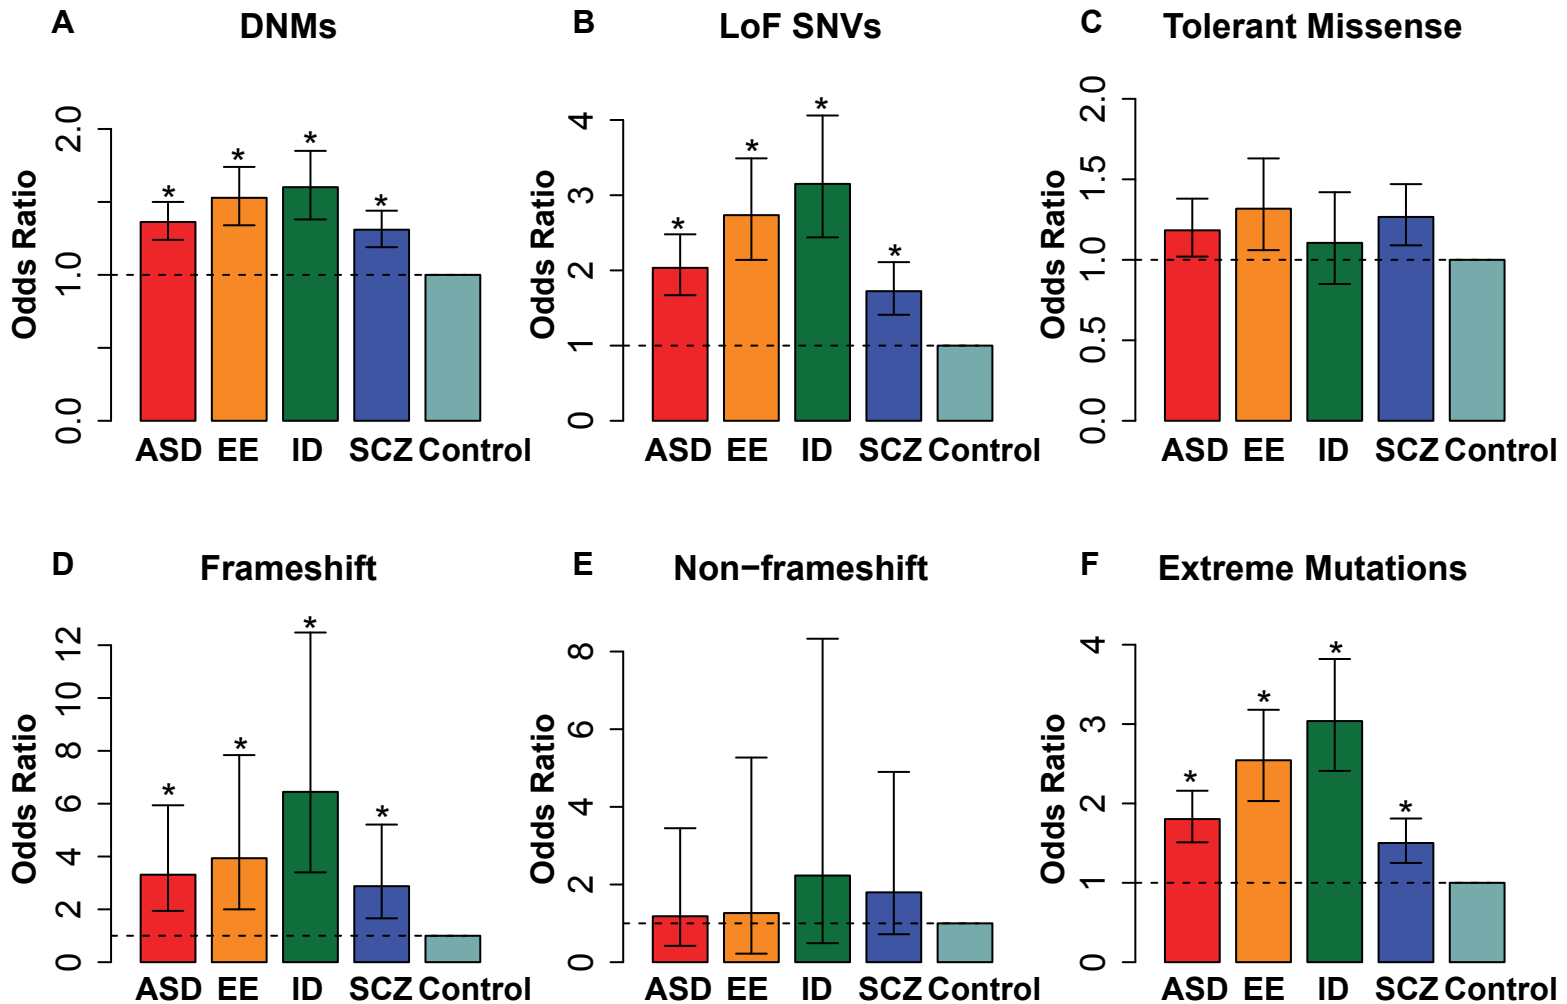

Supplement: NIHMS775440-supplement-supFig2.pdf [file NIHMS775440-supplement-supFig2.pdf]

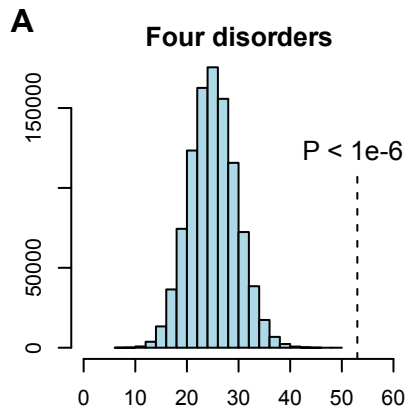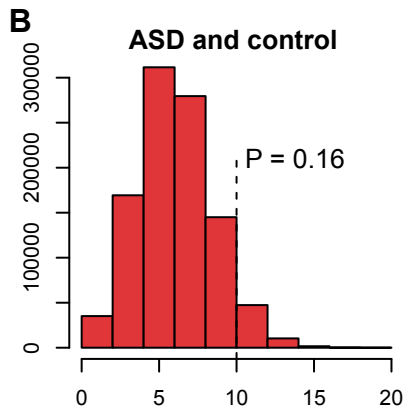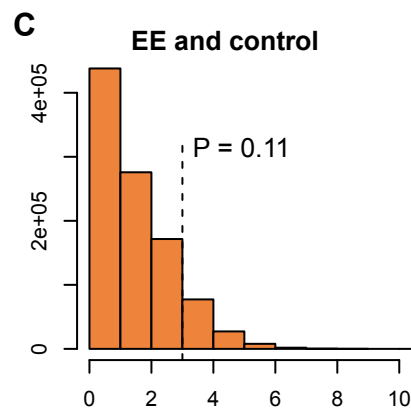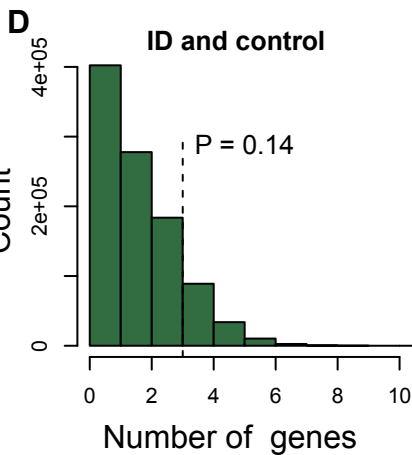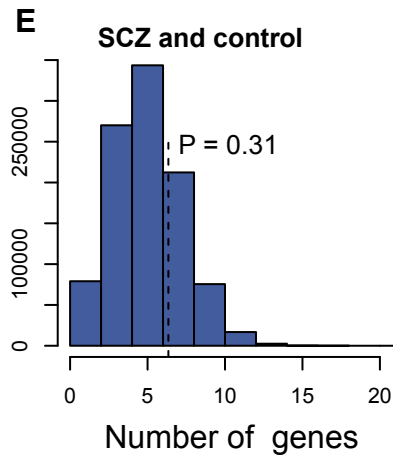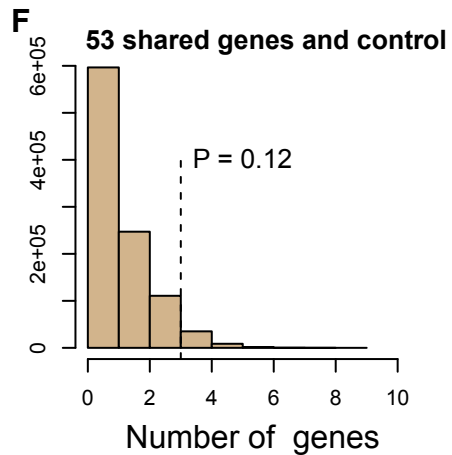

Supplement: NIHMS775440-supplement-supFig3.pdf [file NIHMS775440-supplement-supFig3.pdf]

**A****(15pcw)**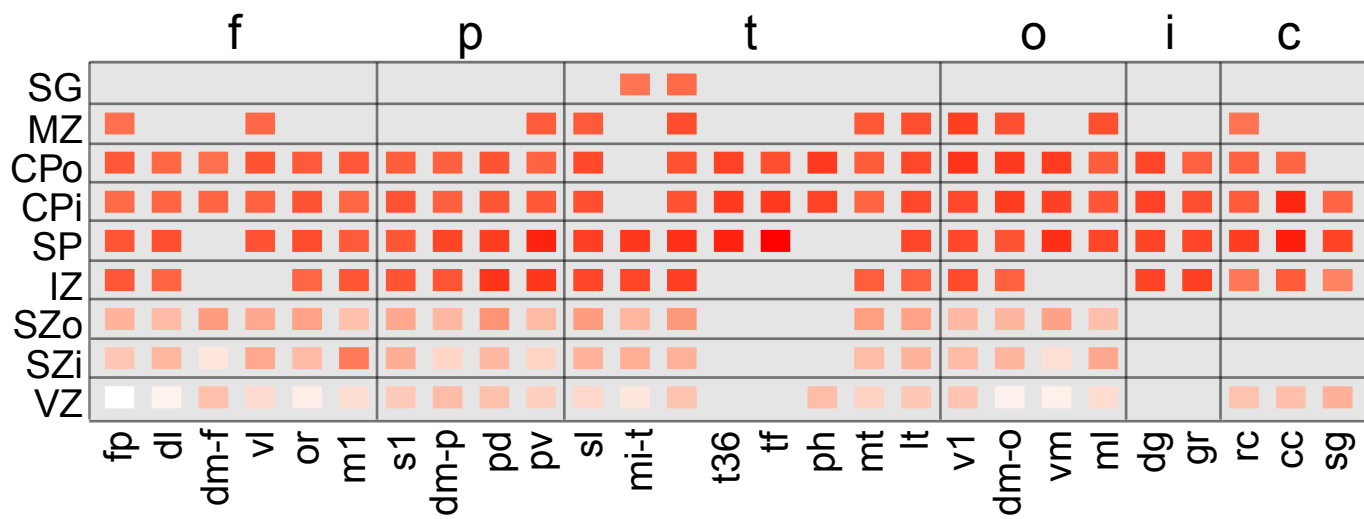**B****(16pcw)**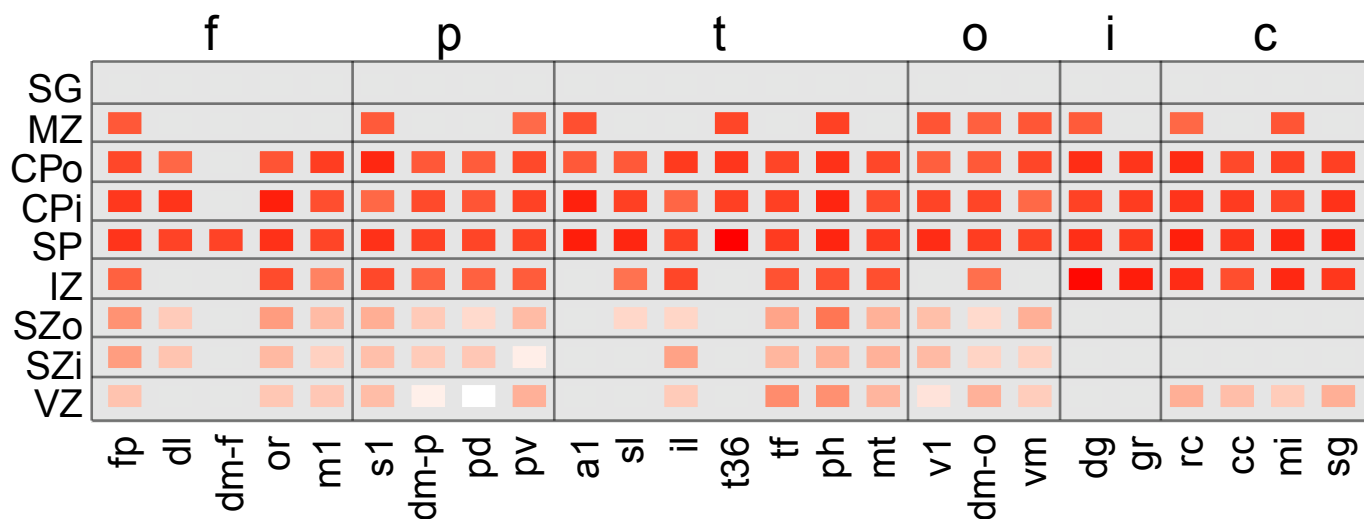**C****(21pcw)**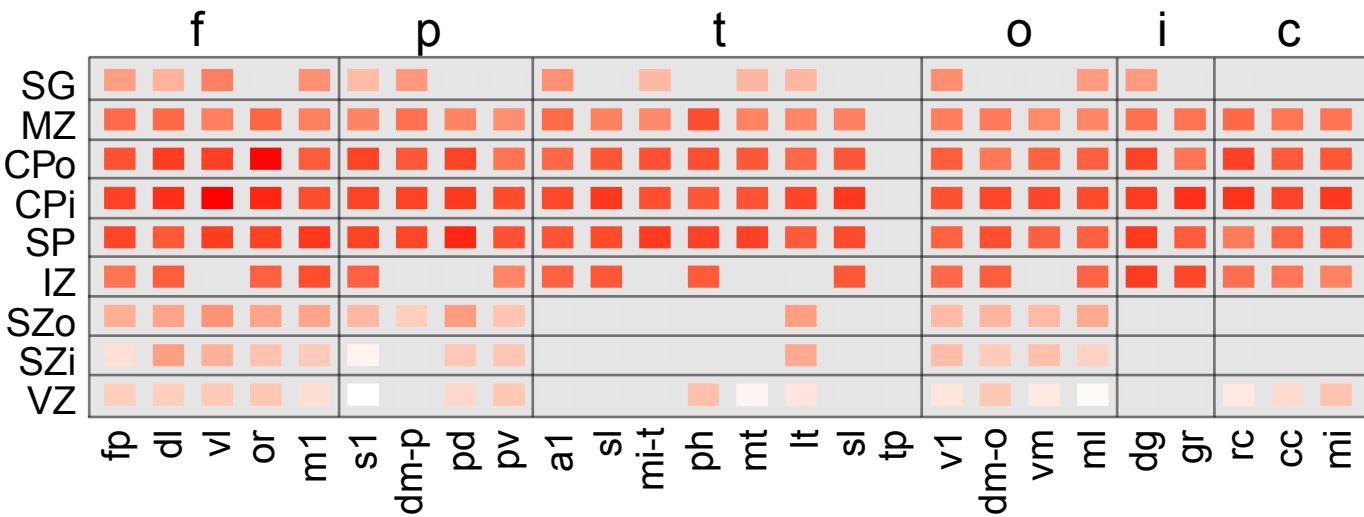**D****(21pcw)**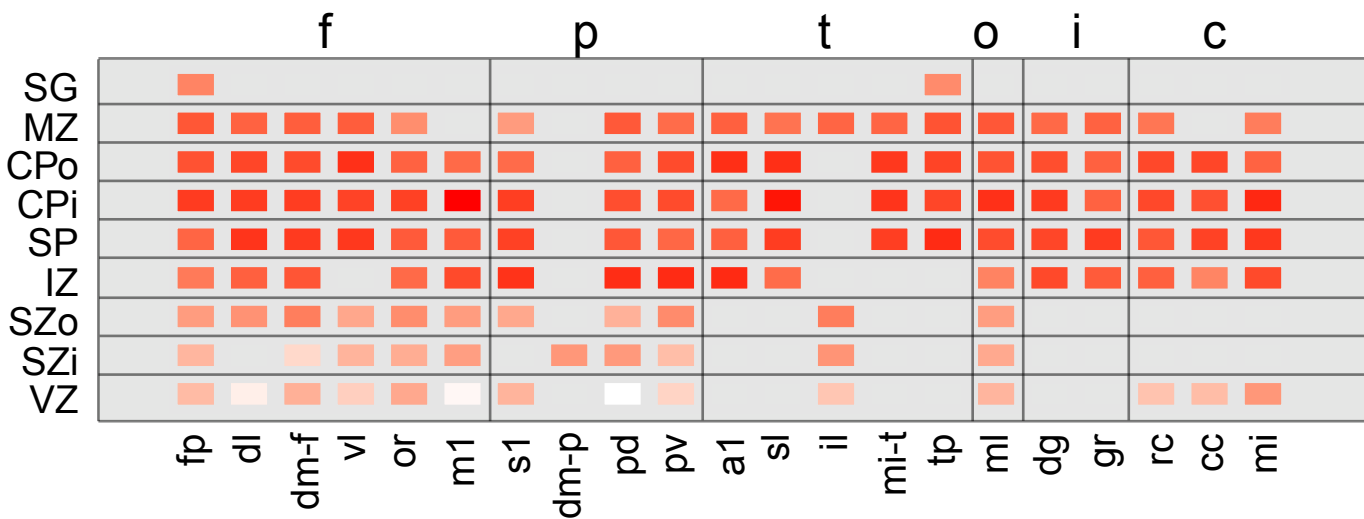

Supplement: NIHMS775440-supplement-supFig4.pdf [file NIHMS775440-supplement-supFig4.pdf]
